# Supplementary material
Source: PubMed Central journal article supplement (PMC6053912)
Supplement: NIHMS981283-supplement-supplement_1.pdf [file NIHMS981283-supplement-supplement_1.pdf]

**eTable 1.** ICD-9 and CPT Codes Used to Define Procedures and Diagnosis

| Variable                                  | Code                                            |
|-------------------------------------------|-------------------------------------------------|
| ICD-9                                     |                                                 |
| Procedure                                 |                                                 |
| Open cholecystectomy                      | 51.21,51.22                                     |
| Laparoscopic cholecystectomy              | 51.23, 51.24                                    |
| Choledochoenterostomy                     | 51.36, 51.37, 51.39, 51.72, 51.79, 51.94        |
| Simple suture of common bile duct         | 51.71, 51.72                                    |
| Endoscopic stent insertion into bile duct | 57.87                                           |
| ERCP                                      | 51.10, 51.11, 51.81, 51.82, 51.84, 51.85, 51.89 |
| Percutaneous transhepatic cholangiogram   | 87.51                                           |
| Lobectomy of liver                        | 50.3                                            |
| Total hepatectomy                         | 50.4                                            |
| Liver transplant                          | 50.5                                            |
| Diagnosis                                 |                                                 |
| Cholecystitis                             | 574.0, 574.1, 575.0-575.4                       |
| Biliary colic                             | 574.2, 574.5-574.7, 575.8, 789.0                |
| CPT                                       |                                                 |
| Procedure                                 |                                                 |
| Open cholecystectomy                      | 47600, 47605, 47610, 47612, 47620,              |
| Laparoscopic cholecystectomy              | 47562-47564, 49310, 49311, 56340-56342          |
